# Supplementary material for: Realizing efficient broadband near-infrared emission under blue light excitation in Sb 3+ -doped zero-dimensional organic tin( iv )-based metal halides via coordination structure modulation
Source: Royal Society of Chemistry journal article supplement (doi:10.1039/d4qi01904k), 2024-01-01
Supplement: d4qi01904k1.pdf [file d4qi01904k1.pdf]

## Supporting Information

### **Realizing Efficient Broadband Near-Infrared Emission under Blue Light Excitation in Sb<sup>3+</sup>-Doped Zero-Dimensional Organic Tin(IV)-Based Metal Halides via Coordination Structure Modulation**

Bao Ke,<sup>†</sup> Hui Peng<sup>‡,\*</sup>, Yongqi Yang,<sup>†</sup> Chengzhi Yang,<sup>†</sup> Shangfei Yao,<sup>†</sup> Arfan Bukhtiar,<sup>†</sup> Qilin Wei,<sup>§,\*</sup> Jialong Zhao<sup>†,‡</sup> Bingsuo Zou<sup>†,‡,\*</sup>

\* Corresponding Authors

<sup>†</sup>School of Physical Science and Technology, Guangxi University, Nanning 530004, China.

<sup>‡</sup>State Key Laboratory of Featured Metal Materials and Life-cycle Safety for Composite Structures, and School of Resources, Environment and Materials, Guangxi University, Nanning 530004, China.

<sup>§</sup>School of Chemistry and Chemical Engineering, Shandong University, Jinan 250100, China.

E-mail: penghuimaterial@163.com (H. Peng); qlwei@sdu.edu.cn (Q. Wei); zoubs@gxu.edu.cn (B. Zou).

**Table S1.** Single crystal X-ray diffraction data of (TBP)<sub>2</sub>SnBr<sub>6</sub> and (TBP)<sub>2</sub>SbBr<sub>5</sub>.

| <b>Empirical formula</b>                             | (TBP) <sub>2</sub> SnBr <sub>6</sub>                              | (TBP) <sub>2</sub> SbBr <sub>5</sub>                              |
|------------------------------------------------------|-------------------------------------------------------------------|-------------------------------------------------------------------|
| <b>Chemical formula</b>                              | C <sub>32</sub> H <sub>72</sub> Br <sub>6</sub> P <sub>2</sub> Sn | C <sub>32</sub> H <sub>71</sub> Br <sub>5</sub> P <sub>2</sub> Sb |
| <b>Formula weight</b>                                | 1116.98                                                           | 1039.12                                                           |
| <b>Temperature (K)</b>                               | 296.15                                                            | 193                                                               |
| <b>Crystal system</b>                                | monoclinic                                                        | triclinic                                                         |
| <b>Space group</b>                                   | C2/c                                                              | P-1                                                               |
| <b>a (Å)</b>                                         | 14.669(4)                                                         | 11.756(4)                                                         |
| <b>b (Å)</b>                                         | 18.782(5)                                                         | 11.880(4)                                                         |
| <b>c (Å)</b>                                         | 18.250(7)                                                         | 16.979(5)                                                         |
| <b>α (deg)</b>                                       | 90                                                                | 98.786(8)                                                         |
| <b>β (deg)</b>                                       | 113.585(5)                                                        | 96.418(9)                                                         |
| <b>γ (deg)</b>                                       | 90                                                                | 104.761(8)                                                        |
| <b>Volume (Å<sup>3</sup>)</b>                        | 4608(2)                                                           | 2237.9(12)                                                        |
| <b>Z</b>                                             | 4                                                                 | 2                                                                 |
| <b>Density (calculated) (g·cm<sup>-3</sup>)</b>      | 1.610                                                             | 1.5442                                                            |
| <b>Absorption coefficient (mm<sup>-1</sup>)</b>      | 5.846                                                             | 5.170                                                             |
| <b>Index ranges</b>                                  | -17 ≤ h ≤ 17, -14 ≤ k ≤ 22, -21 ≤ l ≤ 20                          | -15 ≤ h ≤ 15, -14 ≤ k ≤ 15, -22 ≤ l ≤ 19                          |
| <b>Independent reflections</b>                       | 4058 [R <sub>int</sub> = 0.0736, R <sub>sigma</sub> = 0.0845]     | 10314 [R <sub>int</sub> = 0.0511, R <sub>sigma</sub> = 0.0948]    |
| <b>Data/restraints/parameters</b>                    | 4058/2/191                                                        | 10314/0/369                                                       |
| <b>Goodness of fit on F<sup>2</sup></b>              | 1.050                                                             | 1.023                                                             |
| <b>Final R indexes [I ≥ 2σ (I)]</b>                  | R <sub>1</sub> = 0.0577, wR <sub>2</sub> = 0.1332                 | R <sub>1</sub> = 0.0538, wR <sub>2</sub> = 0.0996                 |
| <b>Final R indexes [all data]</b>                    | R <sub>1</sub> = 0.1003, wR <sub>2</sub> = 0.1537                 | R <sub>1</sub> = 0.1210, wR <sub>2</sub> = 0.1241                 |
| <b>Largest diff. peak and hole (eÅ<sup>-3</sup>)</b> | 0.73 and -1.26                                                    | 0.85 and -1.09                                                    |

**Table S2.** Bond angles of (TBP)<sub>2</sub>SnBr<sub>6</sub> and (TBP)<sub>2</sub>SbBr<sub>5</sub> SCs.

| Samples                              | Atom             | Atom             | Atom             | Angle/°   |
|--------------------------------------|------------------|------------------|------------------|-----------|
| (TBP) <sub>2</sub> SnBr <sub>6</sub> | Br2              | Sn1              | Br1              | 180       |
|                                      | Br3 <sup>1</sup> | Sn1              | Br1              | 88.74(2)  |
|                                      | Br3              | Sn1              | Br1              | 88.74(2)  |
|                                      | Br3              | Sn1              | Br2              | 91.26(2)  |
|                                      | Br3 <sup>1</sup> | Sn1              | Br2              | 91.26(2)  |
|                                      | Br3              | Sn1              | Br3 <sup>1</sup> | 177.48(4) |
|                                      | Br4 <sup>1</sup> | Sn1              | Br1              | 89.77(2)  |
|                                      | Br4              | Sn1              | Br1              | 89.77(2)  |
|                                      | Br4              | Sn1              | Br2              | 90.23(2)  |
|                                      | Br4 <sup>1</sup> | Sn1              | Br2              | 90.23(2)  |
|                                      | Br4 <sup>1</sup> | Sn1              | Br3              | 89.35(4)  |
|                                      | Br4 <sup>1</sup> | Sn1              | Br3 <sup>1</sup> | 90.64(4)  |
|                                      | Br4              | Sn1              | Br3              | 90.64(4)  |
|                                      | Br4              | Sn1              | Br3 <sup>1</sup> | 89.35(4)  |
| Br4                                  | Sn1              | Br4 <sup>1</sup> | 179.53(4)        |           |
| (TBP) <sub>2</sub> SbBr <sub>5</sub> | Br(2)            | Sb(1)            | Br(1)            | 87.85(3)  |
|                                      | Br(2)            | Sb(1)            | Br(4)            | 179.57(3) |
|                                      | Br(2)            | Sb(1)            | Br(3)            | 88.71(3)  |
|                                      | Br(4)            | Sb(1)            | Br(1)            | 92.28(3)  |
|                                      | Br(4)            | Sb(1)            | Br(3)            | 91.16(3)  |
|                                      | Br(5)            | Sb(1)            | Br(1)            | 90.45(3)  |
|                                      | Br(5)            | Sb(1)            | Br(2)            | 90.87(4)  |
|                                      | Br(5)            | Sb(1)            | Br(4)            | 88.71(3)  |
|                                      | Br(5)            | Sb(1)            | Br(3)            | 89.84(3)  |
|                                      | Br(3)            | Sb(1)            | Br(1)            | 176.55(3) |

**Table S3.** Bond lengths of (TBP)<sub>2</sub>SnBr<sub>6</sub> and (TBP)<sub>2</sub>SbBr<sub>5</sub> SCs.

| (TBP) <sub>2</sub> SnBr <sub>6</sub> |      |            | (TBP) <sub>2</sub> SbBr <sub>5</sub> |       |            |
|--------------------------------------|------|------------|--------------------------------------|-------|------------|
| Atom                                 | Atom | Length/Å   | Atom                                 | Atom  | Length/Å   |
| Sn1                                  | Br1  | 2.6272(14) | Sb(1)                                | Br(1) | 2.7794(10) |
| Sn1                                  | Br2  | 2.6043(14) | Sb(1)                                | Br(2) | 2.7503(10) |
| Sn1                                  | Br3  | 2.5932(10) | Sb(1)                                | Br(3) | 2.7761(10) |
| Sn1                                  | Br4  | 2.5932(10) | Sb(1)                                | Br(4) | 2.5172(10) |
| Sn1                                  | Br5  | 2.5869(12) | Sb(1)                                | Br(5) | 2.7770(10) |
| Sn1                                  | Br6  | 2.5868(12) | -                                    | -     | -          |

**Table S4.** Elemental compositions of samples obtained from EDS analysis of Sb<sup>3+</sup>: (TBP)<sub>2</sub>SnBr<sub>6</sub>.

| element      | 5%    | 10%   | 15%   | 20%   |
|--------------|-------|-------|-------|-------|
| Br           | 85.5  | 86.97 | 85.54 | 72.98 |
| Sb           | 0.35  | 0.98  | 2.1   | 5.36  |
| Sn           | 14.15 | 12.05 | 12.35 | 21.66 |
| Sb/(Sn+Sb) % | 2.41  | 7.52  | 14.53 | 19.84 |

**Table S5.** Optical parameters of antimony induced with NIR emission in metal halides.

| Compounds                                                                        | PLE (nm) | PL (nm) | PLQY (%) | Ref.      |
|----------------------------------------------------------------------------------|----------|---------|----------|-----------|
| Sb <sup>3+</sup> :Cs <sub>2</sub> ZnCl <sub>4</sub>                              | 316      | 745     | 69.9     | 1         |
| Sb <sup>3+</sup> :Cs <sub>2</sub> ZnBr <sub>4</sub>                              | 368      | 823     | < 20     |           |
| Sb <sup>3+</sup> :Cs <sub>2</sub> SnCl <sub>4</sub> Br <sub>2</sub>              | 410      | 710     | 8        | 2         |
| Sb <sup>3+</sup> :Rb <sub>2</sub> InBr <sub>5</sub> ·H <sub>2</sub> O            | 365      | 750     | 20       | 3         |
| Sb <sup>3+</sup> : (NH <sub>4</sub> ) <sub>2</sub> SnCl <sub>6</sub>             | 360      | 734     | 23       | 4         |
| (C <sub>13</sub> H <sub>22</sub> N) <sub>2</sub> Sb <sub>2</sub> Cl <sub>8</sub> | 350      | 865     | 5        | 5         |
| (C <sub>10</sub> H <sub>16</sub> N) <sub>2</sub> Sb <sub>2</sub> Cl <sub>8</sub> | 345      | 990     | 3        |           |
| (C <sub>16</sub> H <sub>36</sub> P)SbCl <sub>4</sub>                             | 335      | 1070    | 1        |           |
| (C <sub>19</sub> H <sub>18</sub> P) <sub>2</sub> SbBr <sub>5</sub><br>glass      | 450      | 735     | 5.5      | 6         |
| <i>dis</i> -TPP <sub>2</sub> SbBr <sub>5</sub>                                   | 400      | 738     | 3.3      | 7         |
| Sb <sup>3+</sup> : (TBP) <sub>2</sub> SnBr <sub>6</sub>                          | 452      | 705     | 33.22    | This work |

**Table S6.** The degree of (TBP)<sub>2</sub>SbBr<sub>5</sub>, Sb<sup>3+</sup>:(TBP)<sub>2</sub>SnBr<sub>6</sub> and Sb<sup>3+</sup>:(TBP)<sub>2</sub>SnCl<sub>6</sub> configuration distortions.

| Compounds                                                | $\sigma^2$ | $\Delta d$            |
|----------------------------------------------------------|------------|-----------------------|
| (TBP) <sub>2</sub> SbBr <sub>5</sub>                     | 2.21       | 1.4*10 <sup>-3</sup>  |
| Sb <sup>3+</sup> :(TBP) <sub>2</sub> SnBr <sub>6</sub>   | 0.75       | 2.92*10 <sup>-5</sup> |
| Sb <sup>3+</sup> :(TBP) <sub>2</sub> SnCl <sub>6</sub> * | 0.62       | 2.17*10 <sup>-5</sup> |

\*Data from *Adv. Optical Mater.* 2023, 2301665.

**Table S7.** Comparison of the bond lengths of (TBP)<sub>2</sub>SbBr<sub>5</sub>, undoped and Sb<sup>3+</sup>-doped (TBP)<sub>2</sub>SnBr<sub>6</sub> samples in the ground state and excited state.

|                                      |
|--------------------------------------|
| (TBP) <sub>2</sub> SbBr <sub>5</sub> |
|--------------------------------------|

|               | Sb-Br1 (Å) | Sb-Br2 (Å) | Sb-Br3 (Å) | Sb-Br4 (Å) | Sb-Br5 (Å) | $\Delta d$            |
|---------------|------------|------------|------------|------------|------------|-----------------------|
| Ground state  | 2.7945     | 2.5832     | 2.807      | 2.8295     | 2.7831     | $1.05 \times 10^{-3}$ |
| Excited state | 3.3862     | 3.7946     | 3.4719     | 3.8229     | 3.4305     | $2.75 \times 10^{-3}$ |

---

| (TBP) <sub>2</sub> SnBr <sub>6</sub> |            |            |            |            |            |            |                       |
|--------------------------------------|------------|------------|------------|------------|------------|------------|-----------------------|
|                                      | Sb-Br1 (Å) | Sb-Br2 (Å) | Sb-Br3 (Å) | Sb-Br4 (Å) | Sb-Br5 (Å) | Sb-Br6 (Å) | $\Delta d$            |
| Ground state                         | 2.7087     | 2.7245     | 2.7055     | 2.7292     | 2.7055     | 2.7087     | $1.23 \times 10^{-5}$ |
| Excited state                        | 3.3897     | 3.4255     | 3.389      | 3.4424     | 3.4256     | 3.3897     | $4.01 \times 10^{-5}$ |

---

| Sb <sup>3+</sup> :(TBP) <sub>2</sub> SnBr <sub>6</sub> |            |            |            |            |            |            |                       |
|--------------------------------------------------------|------------|------------|------------|------------|------------|------------|-----------------------|
|                                                        | Sb-Br1 (Å) | Sb-Br2 (Å) | Sb-Br3 (Å) | Sb-Br4 (Å) | Sb-Br5 (Å) | Sb-Br6 (Å) | $\Delta d$            |
| Ground state                                           | 2.7087     | 2.7245     | 2.7055     | 2.7292     | 2.7055     | 2.7087     | $1.23 \times 10^{-5}$ |
| Excited state                                          | 3.3339     | 3.3555     | 3.3178     | 3.3774     | 3.3558     | 3.3173     | $4.30 \times 10^{-5}$ |

#### Evaluation of metal halide configuration distortion:

The degree of metal halide configuration distortions is assessed using the distortion parameters ( $\Delta d$ ) and the magnitude of asymmetric coordination environment ( $\sigma^2$ ) of [Sn(Sb)Br<sub>6</sub>] and [SbBr<sub>5</sub>] units, and their values can be determined using the following equations:

##### Sb<sup>3+</sup>-doped (TBP)<sub>2</sub>SnBr<sub>6</sub> SCs:

$$\sigma^2 = \left(\frac{1}{11}\right) \sum_{i=1}^{12} (\theta_i - 90^\circ)^2 \quad (1)$$

$$\Delta d = \left(\frac{1}{6}\right) \sum_{n=1}^6 \left[ \frac{d_n - d_{ave}}{d_{ave}} \right]^2 \quad (2)$$

##### (TBP)<sub>2</sub>SbBr<sub>5</sub> SCs:

$$\sigma^2 = \left(\frac{1}{7}\right) \sum_{i=1}^8 (\theta_i - 90^\circ)^2 \quad (3)$$

$$\Delta d = \left(\frac{1}{5}\right) \sum_{n=1}^5 \left[ \frac{d_n - d_{ave}}{d_{ave}} \right]^2 \quad (4)$$

where  $\theta_i$  represents the angle of Br-Sn(Sb)-Br,  $d_n$  is the distances of Sn(Sb)-Br bonds, and  $d_{ave}$

denotes the average Sn(Sb)-Br bond length.

The lattice deformation parameters ( $\Delta d$ ) in the ground state and excited state for Sb(III)-based compound and Sb<sup>3+</sup>-doped samples were also given in Table S7. Moreover, the excited state lattice distortion degree ( $\eta$ ) was calculated via the following equation (5):

$$\eta = \frac{\Delta d_{ES} - \Delta d_{GS}}{\Delta d_{GS}} \times 100\% \quad (5)$$

where  $\Delta d_{GS}$  and  $\Delta d_{ES}$  are the lattice deformation parameters ( $\Delta d$ ) in the ground state and excited state, respectively. Here, the calculated  $\eta$  of (TBP)<sub>2</sub>SbBr<sub>5</sub>, (TBP)<sub>2</sub>SnBr<sub>6</sub> and Sb<sup>3+</sup>:(TBP)<sub>2</sub>SnBr<sub>6</sub> are 161.8%, 227.3% and 250.8%, respectively. Clearly, the values of  $\eta$  for the Sb<sup>3+</sup>-doped (TBP)<sub>2</sub>SnBr<sub>6</sub> is much larger than Sb(III)-based compound, resulting in a larger Stokes shift in Sb<sup>3+</sup>-doped samples and further enabling us to obtain NIR emission.

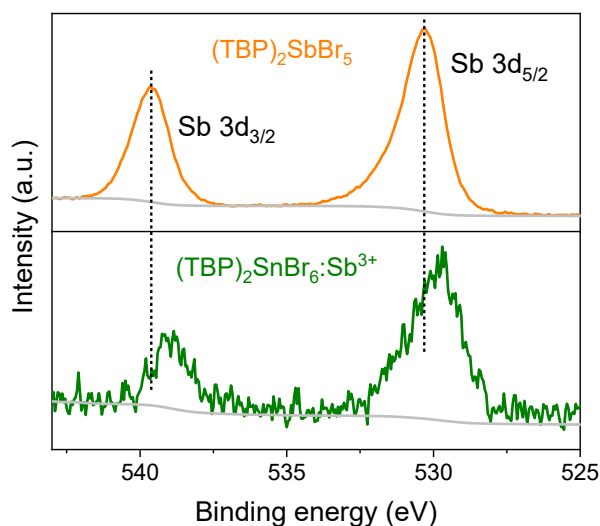

**Figure S1.** HRXPS spectra of Sb 3d for (TBP)<sub>2</sub>SbBr<sub>5</sub> and 0.15Sb<sup>3+</sup>-doped (TBP)<sub>2</sub>SnBr<sub>6</sub>.

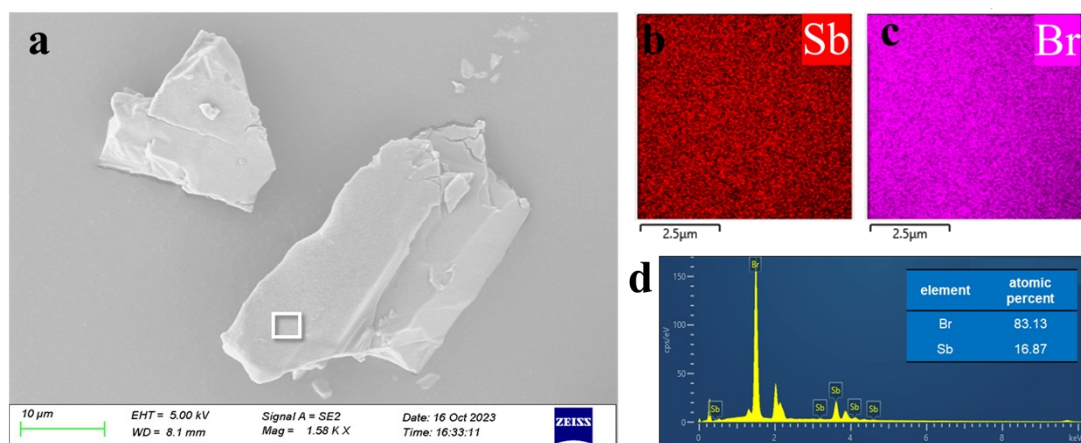

**Figure S2.** SEM (a), EDS element mapping (b, c) and EDS spectrum (d) of  $(\text{TBP})_2\text{SbBr}_5$  samples.

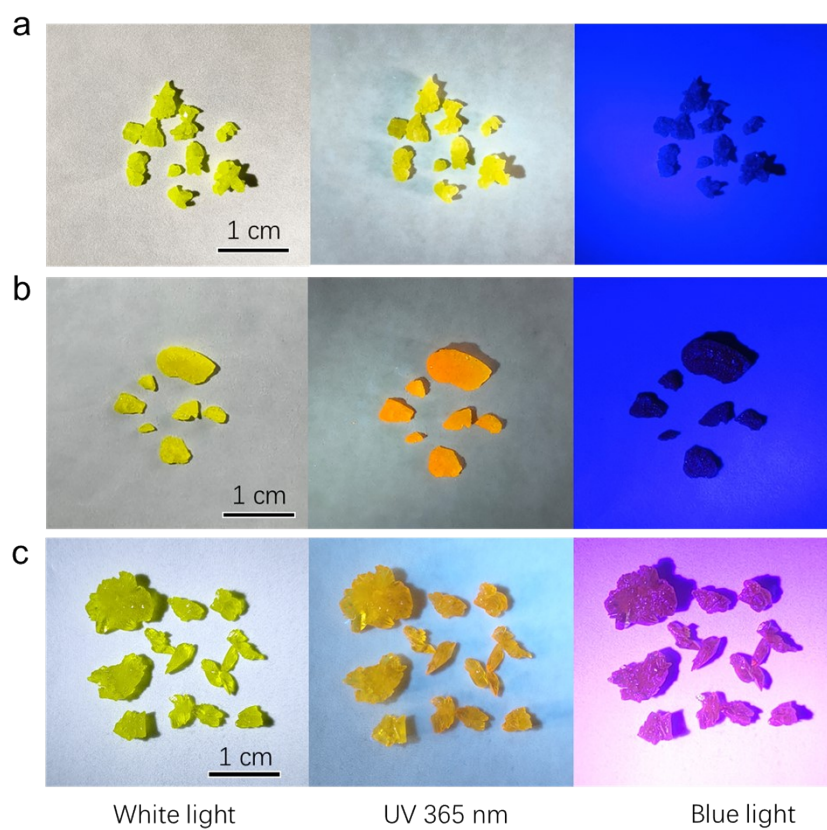

**Figure S3.** Optical images of (a)  $(\text{TBP})_2\text{SnBr}_6$  (b)  $(\text{TBP})_2\text{SbBr}_5$  and (c)  $0.15\text{Sb}^{3+}$ -doped  $(\text{TBP})_2\text{SnBr}_6$  SCs.



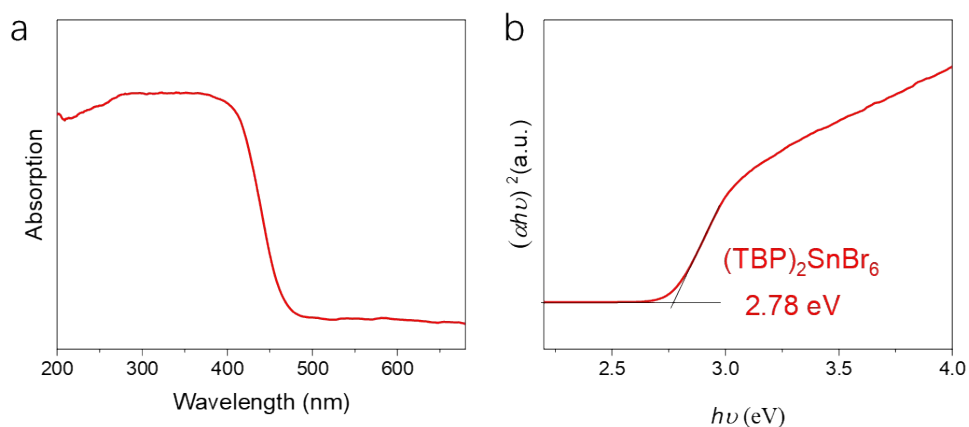

**Figure S4.** UV-vis absorption spectra of  $(\text{TBP})_2\text{SnBr}_6$  (a) and the corresponding Tauc plot (b).

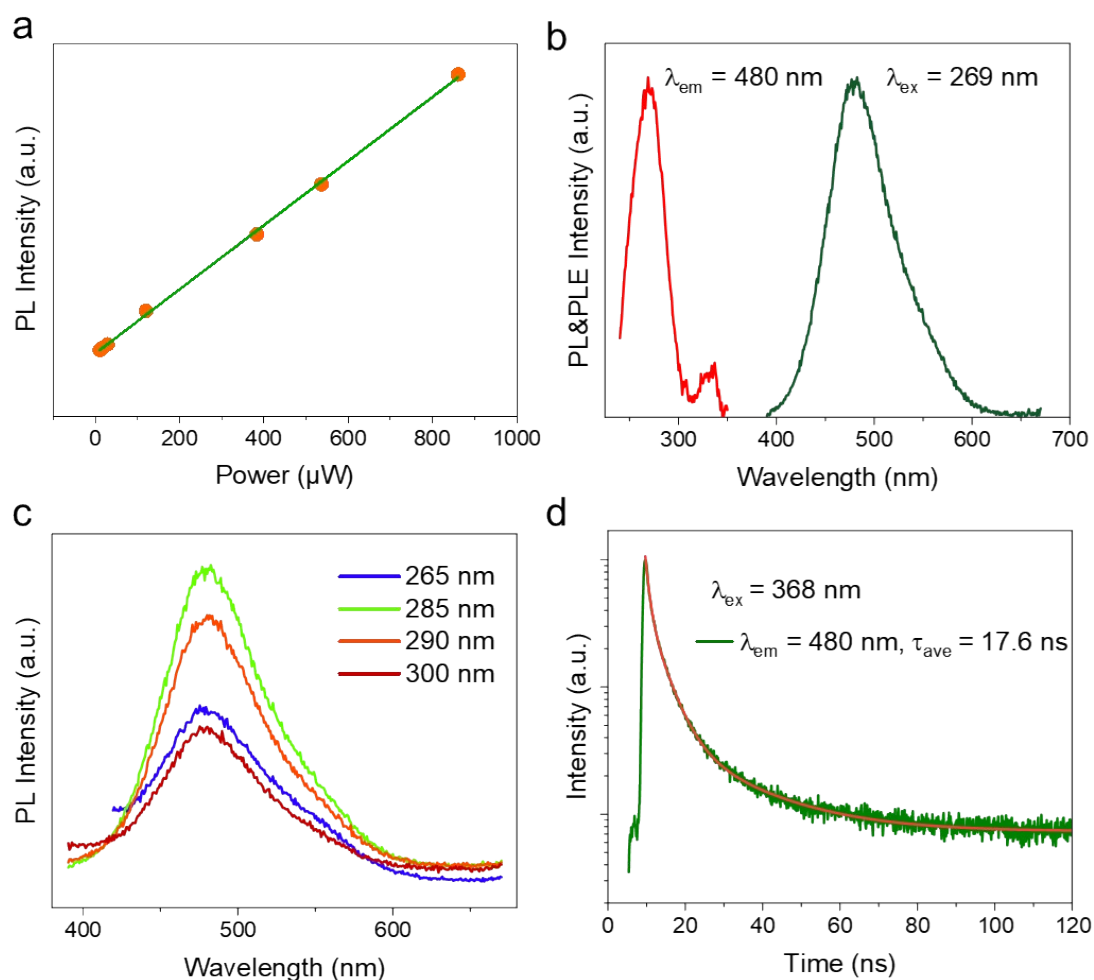

**Figure S5.** (a) Fitting results of PL intensity versus excitation power for  $(\text{TBP})_2\text{SnBr}_6$ . (b) PL and PLE spectra of  $(\text{TBP})_2\text{SnBr}_6$  at RT. (c) PL spectra of  $(\text{TBP})_2\text{SnBr}_6$  recorded using different excitation wavelength at RT. (d) PL decay lifetime of  $(\text{TBP})_2\text{SnBr}_6$  monitoring at different emission wavelengths at RT.

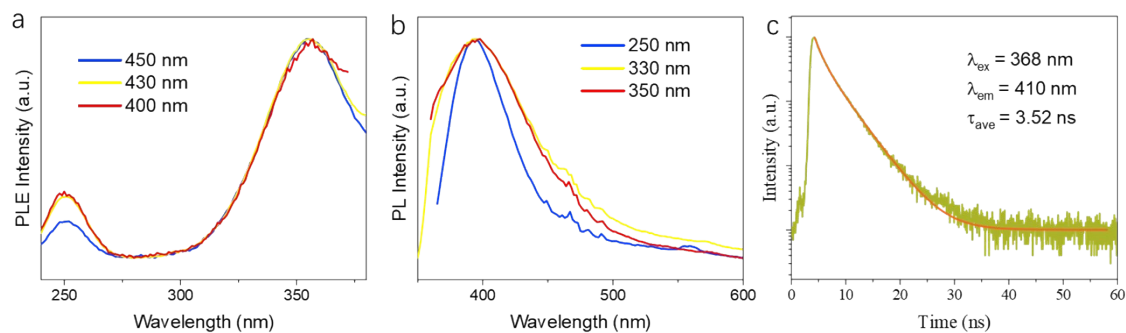

**Figure S6.** (a) PLE of TBPBr monitoring at different emission wavelengths at RT. (b) PL of TBPBr monitoring at different excitation wavelengths at RT. (c) PL decay curves of TBPBr at RT.

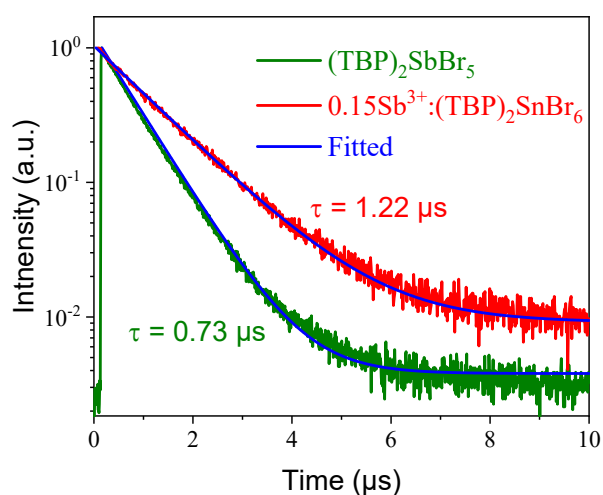

**Figure S7.** PL decay curves were obtained for  $(\text{TBP})_2\text{SbBr}_5$  and  $0.15\text{Sb}^{3+}$ -doped  $(\text{TBP})_2\text{SnBr}_6$  under 405 nm excitation at RT.

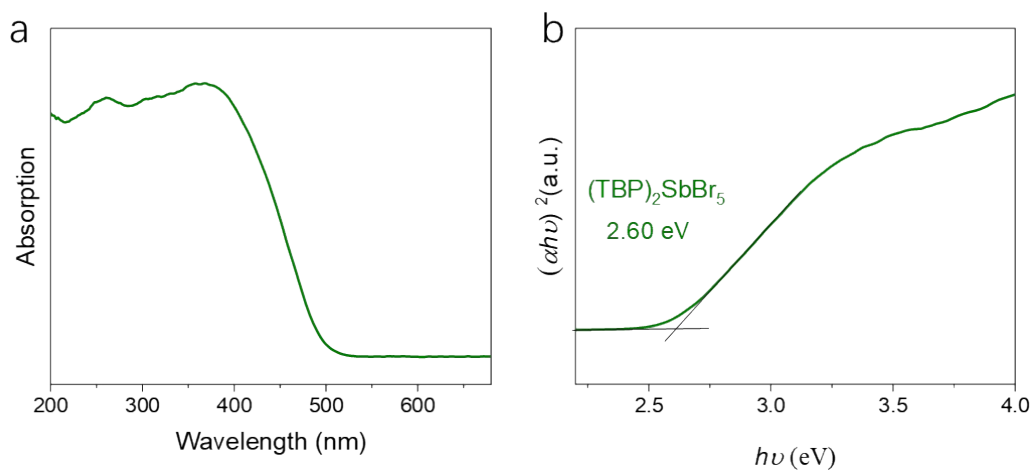

**Figure S8.** UV-vis absorption spectra of  $(\text{TBP})_2\text{SbBr}_5$  (a) and the corresponding Tauc plot (b).

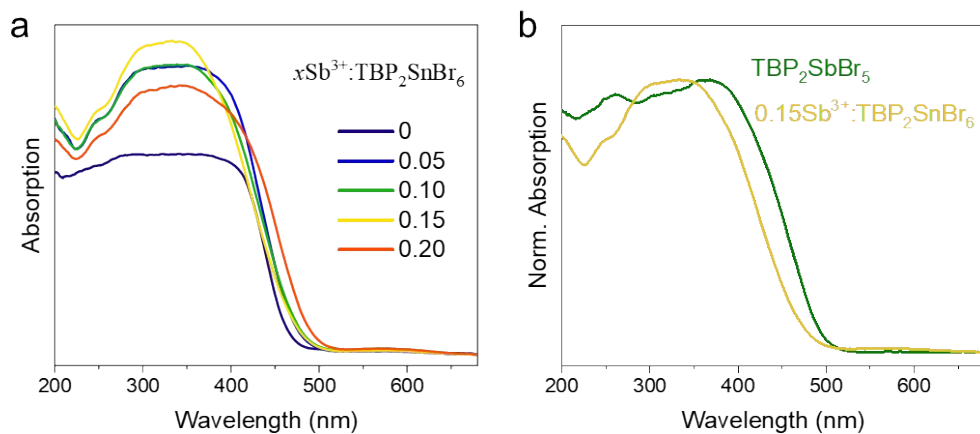

**Figure S9.** (a) UV-vis absorption spectra of  $\text{Sb}^{3+}$ -doped  $(\text{TBP})_2\text{SnBr}_6$  with various  $\text{Sb}/(\text{Sn}+\text{Sb})$  ratios. (b) UV-vis absorption spectra of  $(\text{TBP})_2\text{SbBr}_5$  and  $0.15\text{Sb}^{3+}$ -doped  $(\text{TBP})_2\text{SnBr}_6$ .

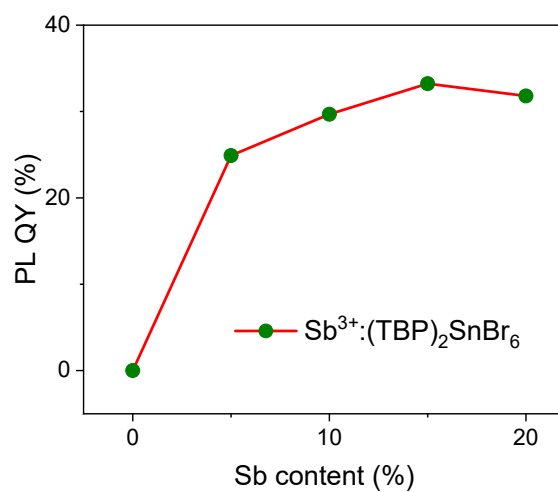

**Figure S10.** PLQY of  $\text{Sb}^{3+}$ -doped  $(\text{TBP})_2\text{SnBr}_6$  SCs with various  $\text{Sb}/(\text{Sn}+\text{Sb})$  ratios.

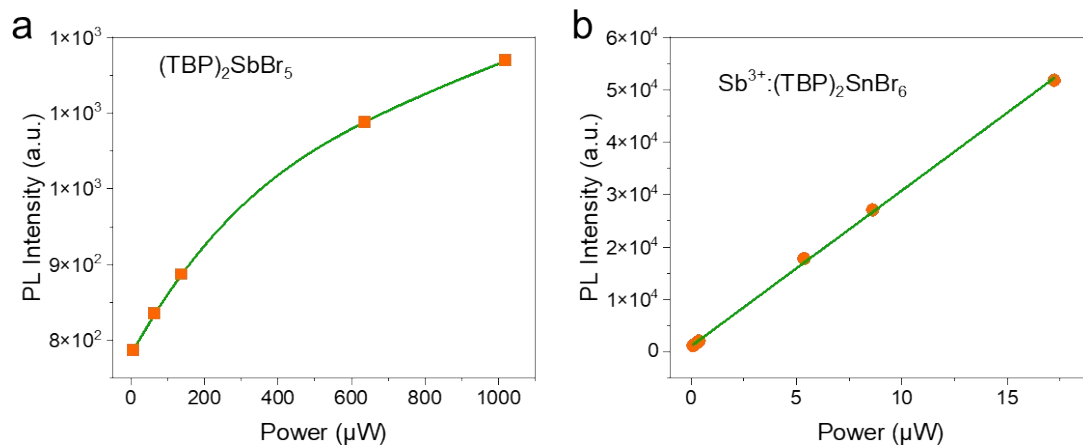

**Figure S11.** Fitting results of PL intensity versus excitation power for  $(\text{TBP})_2\text{SbBr}_5$  (a) and  $\text{Sb}^{3+}$ -doped  $(\text{TBP})_2\text{SnBr}_6$  (b).

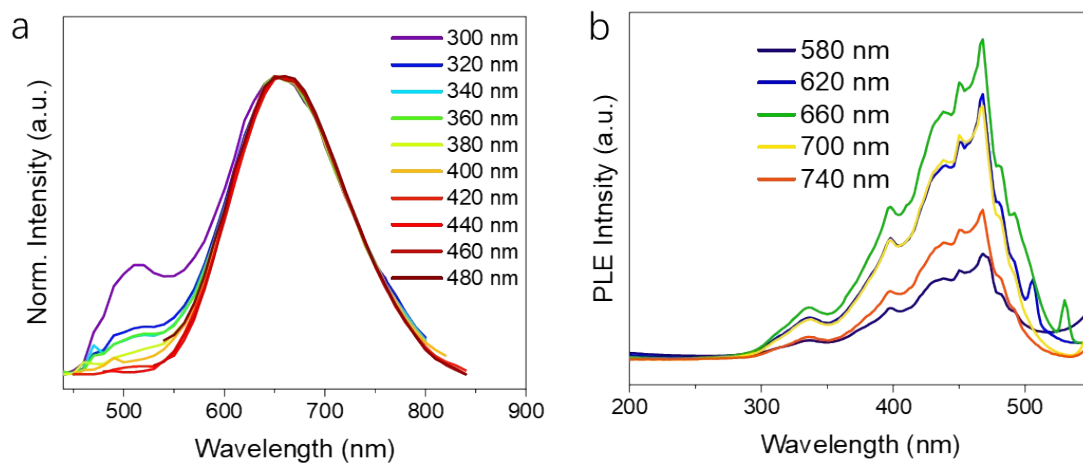

**Figure S12.** The optical properties of  $(\text{TBP})_2\text{SbBr}_5$ : (a) PL spectra recorded using different excitation wavelength at RT. (b) PLE spectra recorded using different emission wavelength at RT.

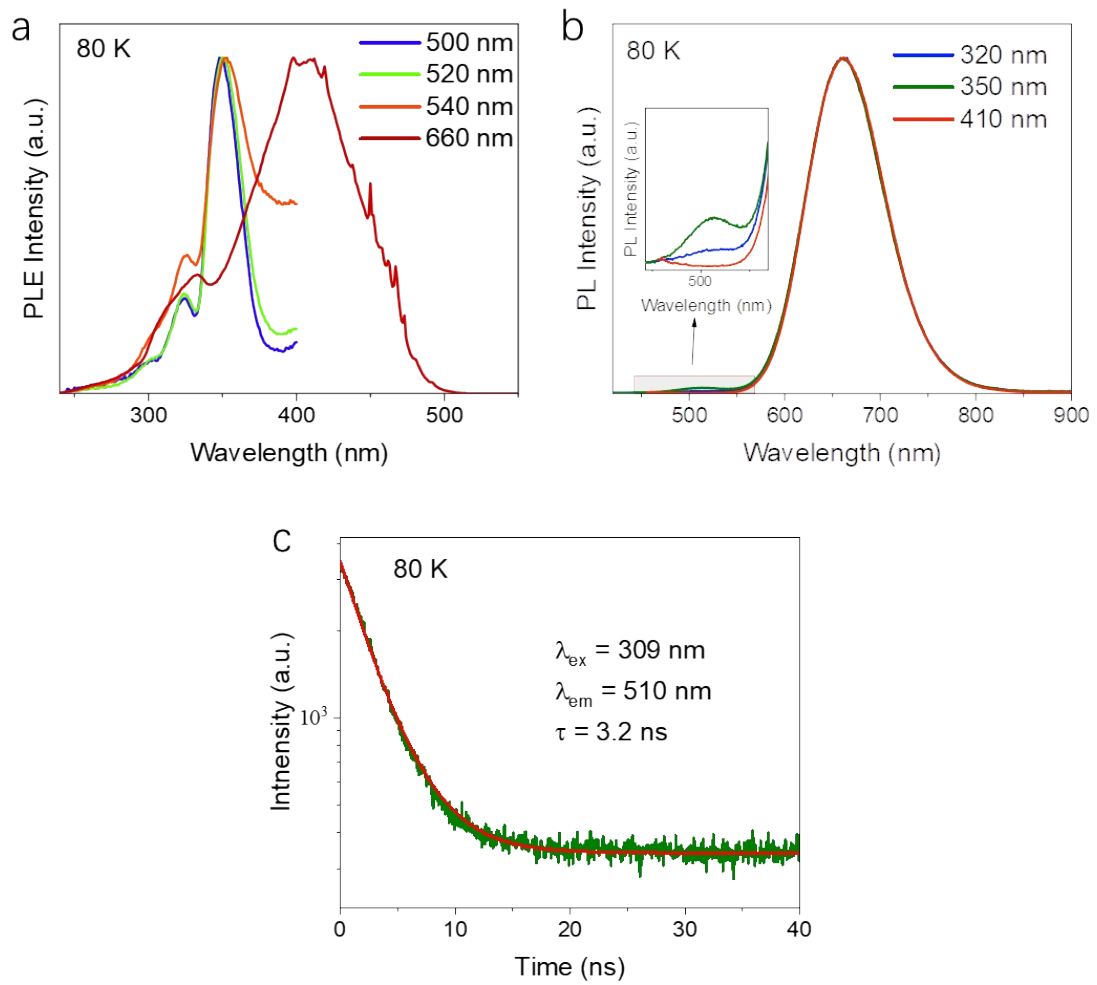

**Figure S13.** The optical properties of  $(TBP)_2SbBr_5$ : (a) PLE spectra recorded using different emission wavelength at 80K. (b) PL spectra recorded using different excitation wavelength at 80 K. (c) PL decay lifetime at 80 K.

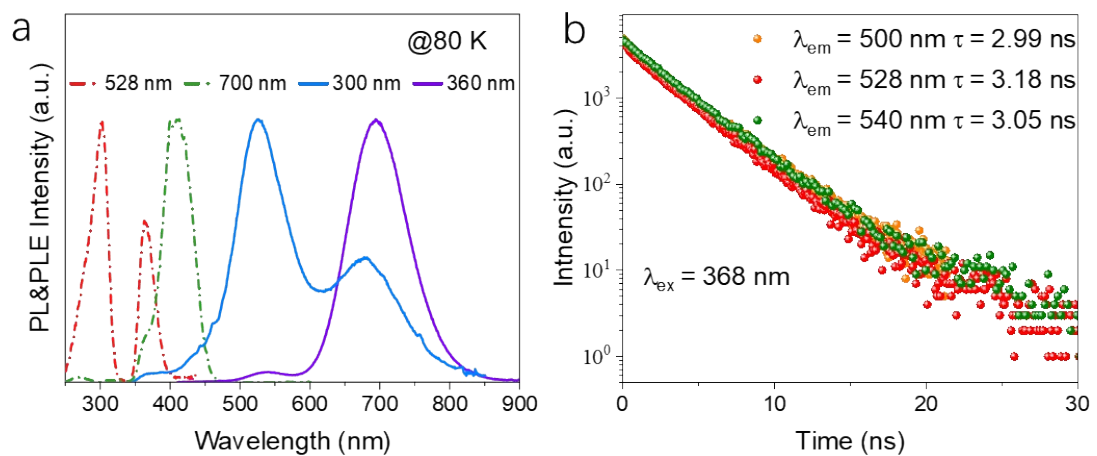

**Figure S14.** (a) Normalized PL and PLE spectra and (b) PL decay lifetime of  $Sb^{3+}$ -doped  $(TBP)_2SnBr_6$  SCs at 80 K.

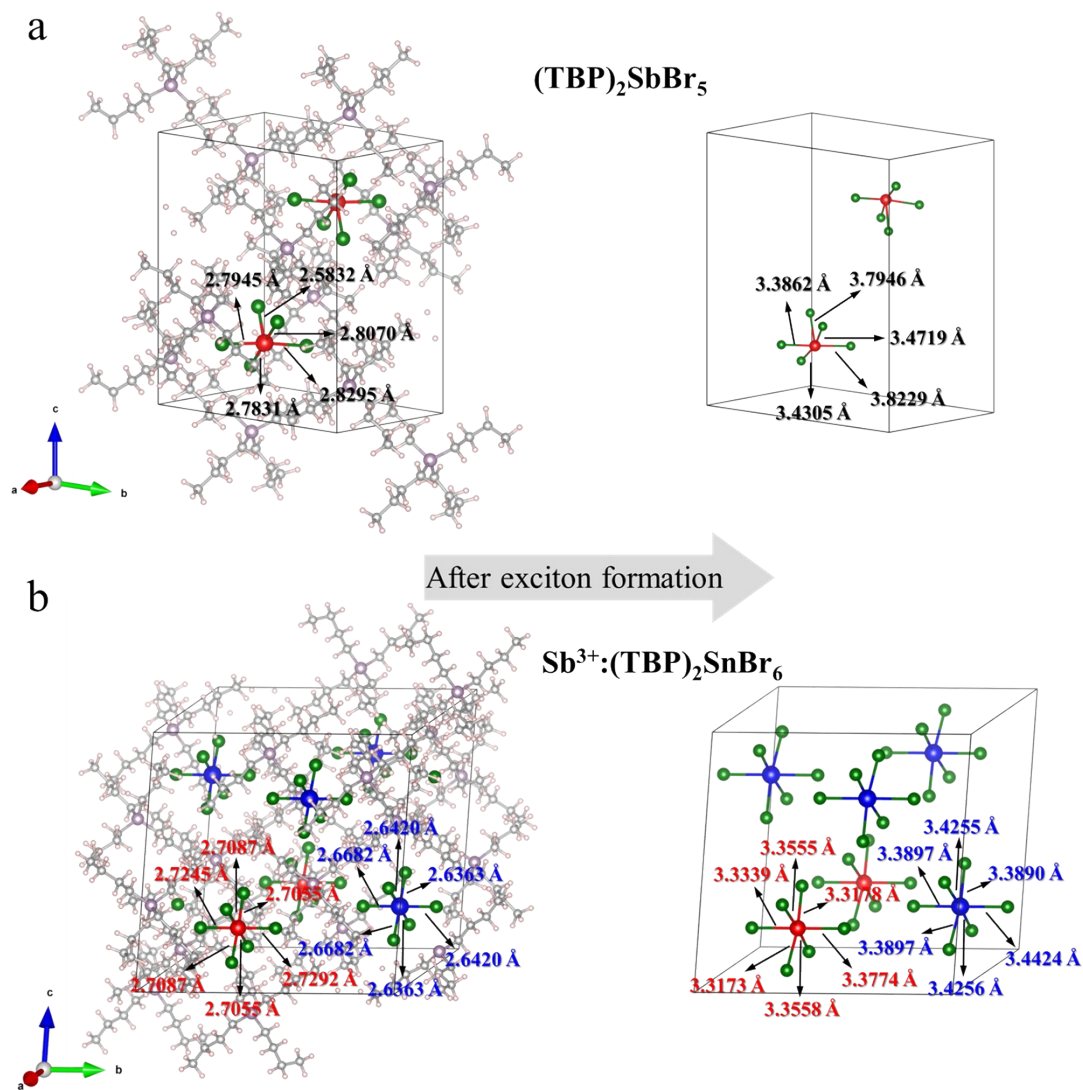

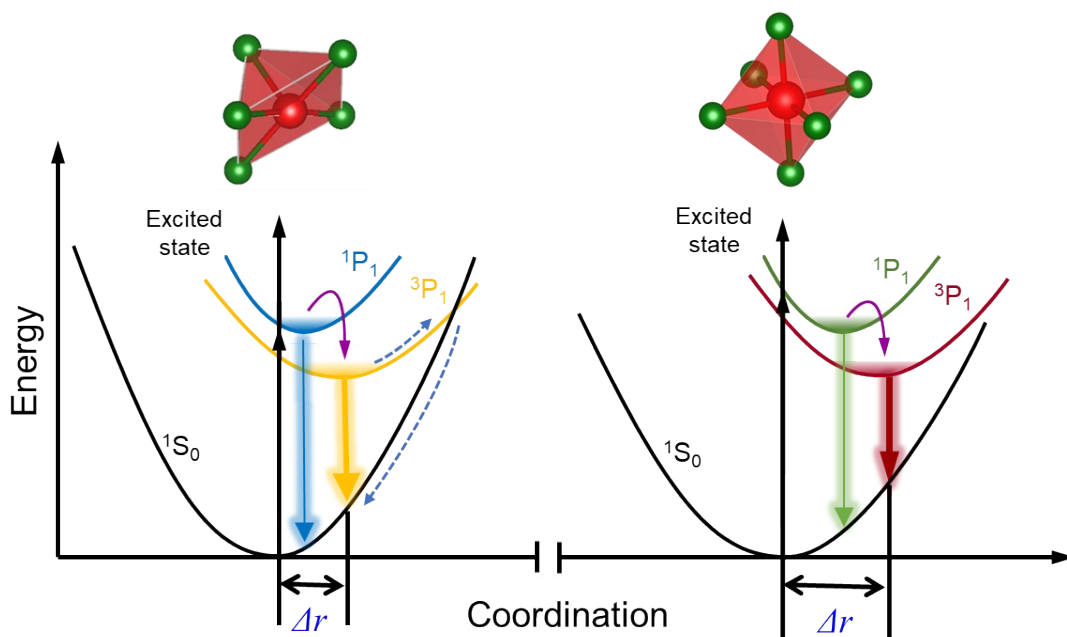

**Figure S16.** Structures of the metal halide polyhedrons and the corresponding configuration-coordinate diagrams of the  $ns^2$  metal ions. (a)  $[SbBr_5]^{2-}$  polyhedron with large distortion is favorable for the low PL intensity of the  $(TBP)_2SbBr_5$ ; (b)  $[SbBr_6]^{3-}$  clusters with small distortion is favorable for the high PL intensity of the  $Sb^{3+}$ -doped  $(TBP)_2SnBr_6$ . The lattice distortion degree enables  $Sb^{3+}$ -doped  $(TBP)_2SnBr_6$  exhibits a large Stokes shift and yield a broadband NIR emission. Blue dotted line: energy dissipation and loss;  $\Delta r$ : Stokes shift.

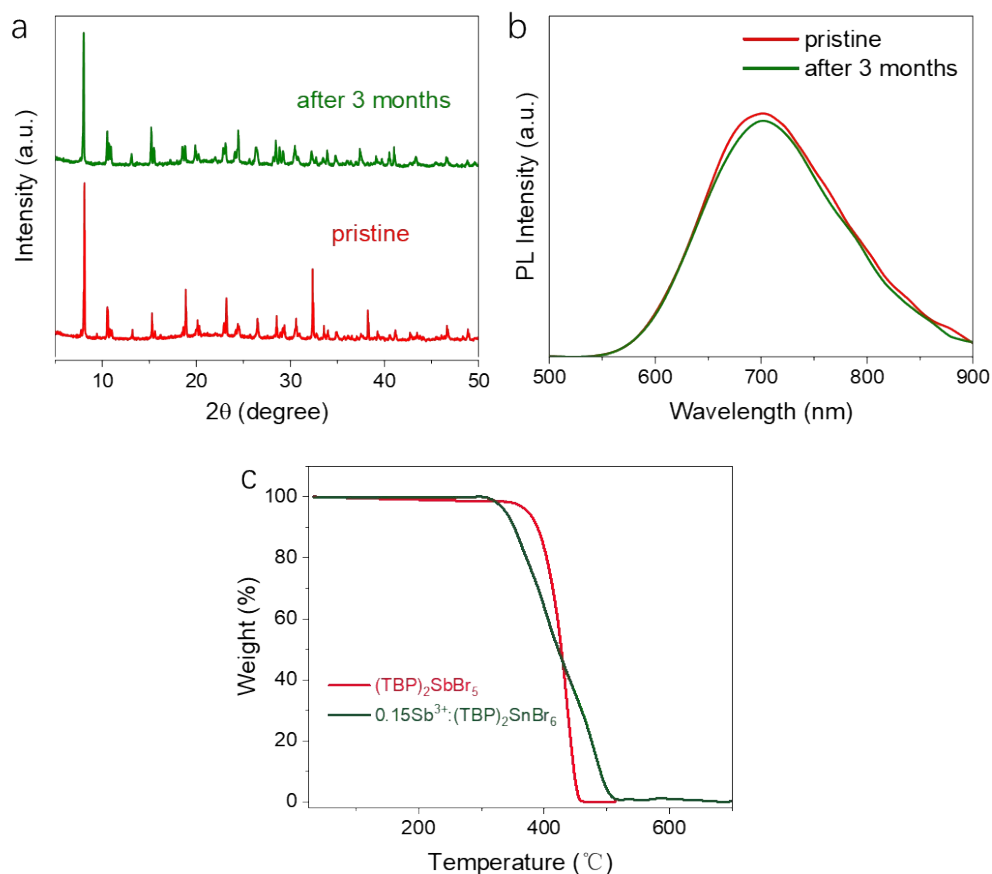

**Figure S17.** (a) PXRD patterns of  $\text{Sb}^{3+}$ -doped  $(\text{TBP})_2\text{SnBr}_6$  stored in atmospheric environment for 3 months. (b) Normalized PL spectra of  $\text{Sb}^{3+}$ -doped  $(\text{TBP})_2\text{SnBr}_6$  stored in atmospheric environment for 3 months. (c) TG curves of  $(\text{TBP})_2\text{SbBr}_5$  and  $\text{Sb}^{3+}$ -doped  $(\text{TBP})_2\text{SnBr}_6$  powders.

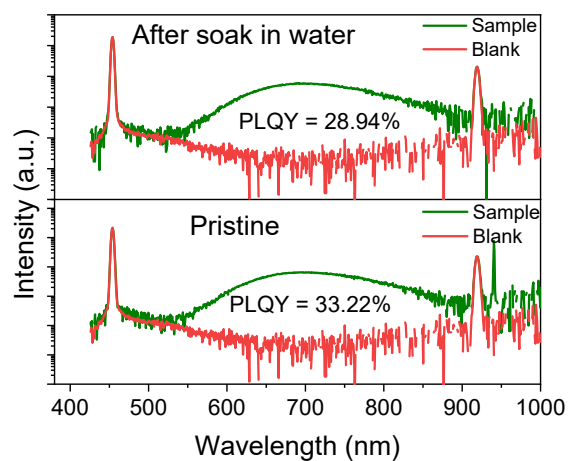

**Figure S18.** The change of  $\text{Sb}^{3+}$ -doped  $(\text{TBP})_2\text{SnBr}_6$  in PLQY before and after immersion in water for 4 h.



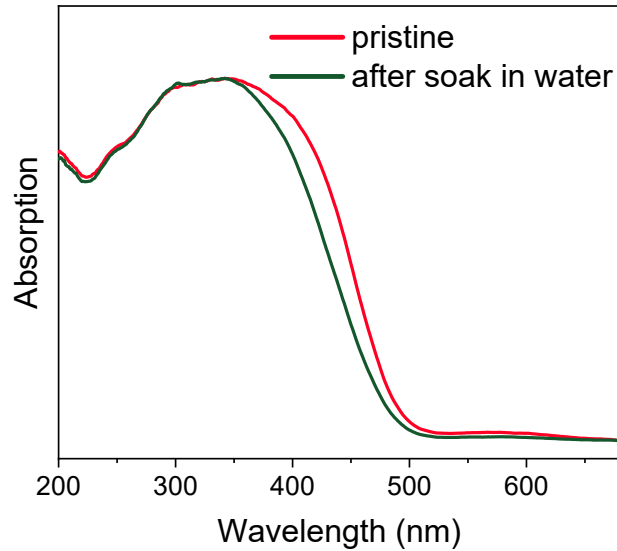

**Figure S19.** Absorption spectra of pristine and after soak in water for  $\text{Sb}^{3+}$ -doped  $(\text{TBP})_2\text{SnBr}_6$ .

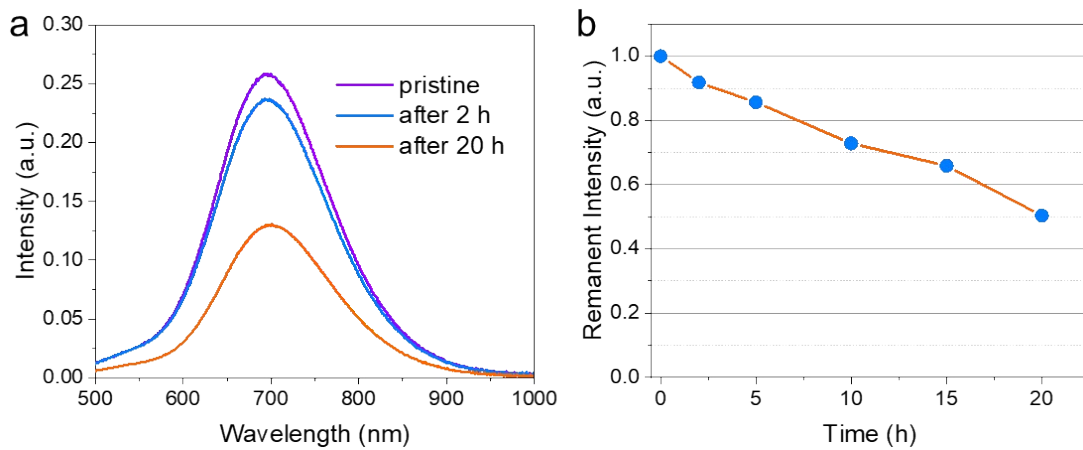

**Figure S20.** Stability test of NIR pc-LED with continuous operation time at 20 mA (a) EL spectra under various operation time. (b) Remanent EL intensity curve with operation time.

## REFERENCES

- (1) Su, B.; Li, M.; Song, E.; Xia, Z.  $\text{Sb}^{3+}$  -Doping in Cesium Zinc Halides Single Crystals Enabling High-Efficiency Near-Infrared Emission. *Adv. Funct. Mater.* **2021**, *31* (40), 2105316.
- (2) Xiong, G.; Yuan, L.; Jin, Y.; Wu, H.; Qu, B.; Li, Z.; Ju, G.; Chen, L.; Yang, S.; Hu, Y. Highly Efficient and Stable Broadband Near-Infrared-Emitting Lead-Free Metal Halide Double Perovskites. *J. Mater. Chem. C* **2021**, *9* (38), 13474–13483.
- (3) Cheng, X.; Li, R.; Zheng, W.; Tu, D.; Shang, X.; Gong, Z.; Xu, J.; Han, S.; Chen, X. Tailoring the Broadband Emission in All-Inorganic Lead-Free 0D In-Based Halides

through  $\text{Sb}^{3+}$  Doping. *Adv. Opt. Mater.* **2021**, *9* (12), 2100434.

(4) Lin, H.; Wei, Q.; Ke, B.; Lin, W.; Zhao, H.; Zou, B. Excitation-Wavelength-Dependent Emission Behavior in  $(\text{NH}_4)_2\text{SnCl}_6$  via  $\text{Sb}^{3+}$  Dopant. *J. Phys. Chem. Lett.* **2023**, *14* (6), 1460–1469.

(5) Su, B.; Geng, S.; Xiao, Z.; Xia, Z. Highly Distorted Antimony(III) Chloride  $[\text{Sb}_2\text{Cl}_8]^{2-}$  Dimers for Near-Infrared Luminescence up to 1070 nm. *Angew. Chem. Int. Ed.* **2022**, *61* (33), e202208881.

(6) Li, B.; Jin, J.; Yin, M.; Zhang, X.; Molokeev, M.; Xia, Z.; Xu, Y. Sequential and Reversible Phase Transformations in Zero-Dimensional Organic-Inorganic Hybrid Sb-Based Halides towards Multiple Emissions. *Angew. Chem. Int. Ed.* *61* (49), e202212741.

(7) Morad, V.; Yakunin, S.; Benin, B. M.; Shynkarenko, Y.; Grotevent, M. J.; Shorubalko, I.; Boehme, S. C.; Kovalenko, M. V. Hybrid 0D Antimony Halides as Air-Stable Luminophores for High-Spatial-Resolution Remote Thermography. *Adv. Mater.* **2021**, *33* (9), 2007355.
